# Supplementary material for: Decomposition and scenario analysis of agricultural carbon emissions in Heilongjiang, China
Source: PeerJ. 2024 Aug 12;12:e17856. doi: 10.7717/peerj.17856 (PMC11326430; doi:10.7717/peerj.17856)
Supplement: Supplemental Information 1 [file peerj-12-17856-s001.xlsx]

## Sheet: Sheet1
Year	Rice cultivation	Cropland emissions	Machinery use	Irrigation electricity	Pesticide production	Agricultural film Production	Fertilizer production	Total emissions/million tons
1993	3.36323	1.57294	1.67171	3.15723	1.04417	3.1086	5.81154	19.7294
1994	3.41806	1.69119	2.02773	2.75512	1.11038	3.31135	6.22414	20.538
1995	3.81562	1.71677	2.05868	2.9711	1.15768	4.91951	6.30138	22.9407
1996	5.06769	1.82394	2.11131	3.6223	1.37696	8.13523	6.64407	28.7815
1997	6.38373	1.8943	2.2692	4.36033	1.65366	8.96706	6.95177	32.48
1998	7.14228	1.92316	2.35588	4.47157	1.72786	6.61239	7.04007	31.2732
1999	7.3799	1.86076	2.37755	5.33441	1.74229	6.53315	6.9967	32.2248
2000	7.33878	1.7748	2.47352	5.51349	1.81053	6.20746	6.74464	31.8632
2001	7.20626	1.7723	2.52615	5.67087	1.90267	6.0643	6.78495	31.9275
2002	7.17884	1.7982	2.54782	5.92863	2.17538	5.9258	7.03072	32.5854
2003	5.91763	1.72785	2.64378	5.73056	2.24718	6.1432	6.81608	31.2263
2004	7.65408	1.95607	2.86668	6.19183	2.89623	6.19705	7.74113	35.5031
2005	8.45376	1.99055	3.08648	6.49572	2.91619	6.60989	8.09207	37.6447
2006	9.10264	2.2272	3.25675	5.51349	3.55817	7.01982	10.0965	40.7745
2007	10.4552	2.40285	3.23817	6.49572	5.01854	7.32037	10.9118	45.8427
2008	12.0135	2.30769	3.41153	8.47374	3.83408	7.6856	9.45668	47.1828
2009	12.3151	2.51002	3.67158	9.24161	4.10562	7.52221	10.3778	49.7439
2010	14.344	2.69286	3.95949	10.5147	4.53017	8.13306	11.1689	55.3432
2011	15.7057	2.85197	4.13594	11.7561	4.78833	8.7792	11.8391	59.8563
2012	16.5922	2.99908	4.30931	12.9602	4.94514	9.80114	12.4805	64.0876
2013	17.6432	3.03761	4.34336	14.4949	5.16042	9.85757	12.7347	67.2718
2014	18.1322	3.11702	4.48886	14.3948	5.3671	9.82511	13.0956	68.4206
2015	17.9037	3.12388	4.48886	15.0072	5.09488	9.67379	13.3573	68.6496
2016	17.9357	3.08535	4.50434	16.1536	5.06571	9.58107	13.2815	69.6072
2017	18.0454	3.03075	4.54459	16.3641	5.11141	9.23515	13.1237	69.4551
2018	17.2868	2.97287	4.59412	16.6045	4.5564	8.84487	12.9253	67.7849
2019	17.4239	2.63139	4.25358	16.7619	3.9474	8.08504	11.8006	64.9038
2020	17.6935	2.60082	4.28764	16.7456	3.73132	7.87279	11.7902	64.7218
